# Metabolic activity and water vapour absorption in the mealworm *Tenebrio molitor* L. (Coleoptera, Tenebrionidae): real-time measurements by two-channel microcalorimetry

Lars L. Hansen, Hans Ramløv\* and Peter Westh\*

Department of Life sciences and Chemistry, Roskilde University, DK-4000 Roskilde, Denmark

\*Authors for correspondence (e-mail: hr@ruc.dk, pwesth@ruc.dk)

Accepted 24 October 2003

## Summary

This work describes a new calorimetric method in which the metabolic heat production and water exchange rates of an insect larva are measured simultaneously and in real time. The experimental set-up is based on two independent calorimetric cells, which are perfused by a stream of air at controlled relative humidity (RH). The resolution for metabolic heat flow and water flux is  $1 \mu\text{W}$  and  $5 \mu\text{g h}^{-1}$ , respectively. The method was used to investigate water vapour absorption (WVA) in drought-stressed larvae of the common mealworm *Tenebrio molitor*. It was found that during exposure to a linear increment in RH of 3% per hour, the larvae initiated WVA upon passing a threshold value of  $92.7 \pm 0.6\%$  RH. The rate of water absorption subsequently increased to reach a maximal level of  $86 \pm 6 \mu\text{g h}^{-1}$ , 10–15 h after passing the threshold value. Concomitantly, the RH in the calorimetric cell was reduced to  $88.6 \pm 0.5\%$ .

The metabolic heat production of the larvae was  $5\text{--}6 \text{ J h}^{-1} \text{ g}^{-1}$  wet mass in the initial part of the experiment. However, this value doubled 2–3 h prior to the onset of WVA, when the RH had reached 88%. This increase in metabolic heat production gradually tapered off over the following 24 h of WVA, during which time WVA remained high. Animals exposed to RH protocols that did not induce WVA showed no such anomalies in metabolic heat flow. This may suggest that the increased metabolism reflects the preparation of the WVA apparatus. Finally, the method was used to quantify water losses in the microgram range associated with wriggling and tracheal ventilation.

Key words: water exchange, specific corrected metabolic heat flux, controlled relative humidity, water vapour absorption threshold, mealworm, *Tenebrio molitor*.

## Introduction

Several groups of terrestrial arthropods are capable of actively absorbing water from air well below its point of saturation (Dunbar and Winston, 1975; Machin and O'Donnell, 1991; Noble-Nesbitt, 1973, 1978). Active water absorption has been shown to occur in different organs including the rectum of *Tenebrio molitor* larvae, and in the two oral sacs of *Arenivaga investigata* (Machin, 1975, 1978; Noble-Nesbitt, 1970, 1973; O'Donnell and Machin, 1991). Water vapour absorption is an energy-requiring process because a substantial difference in water activity between the atmosphere and the activity of the haemolymph must be overcome (Hadley, 1994; Ramsay, 1964). Theoretical calculations and some experimental measurements have indicated, however, that the amount of energy required is relatively small compared to the total amount of stored energy resources (Hadley, 1994; Ramsay, 1964).

Since early studies by Buxton (1930) and Mellanby (1932), gravimetric methods have been most commonly used for measuring evaporative water loss in arthropods (Audsley et al., 1993; Hadley, 1994; Pelletier, 1995; Ramløv and Lee, 2000).

This method assumes that mass loss and water loss are equivalent (Wharton and Richards, 1978). Changes in body mass are usually recorded at fixed intervals under known conditions of temperature and humidity (Beament, 1959; Dunbar and Winston, 1975; Edney, 1971; Machin, 1975, 1976, 1978; Machin and O'Donnell, 1991; Noble-Nesbitt, 1978; Pelletier, 1995). These measurements are often done in static systems with no air movement, which may cause water vapour gradients within the container housing the animal (Hadley, 1994). Gravimetrically determined water flux, however, is susceptible to certain errors, particularly the disruption of experimental temperatures and relative humidity (RH) during weighing (Hadley, 1994). Machin (1976) designed a flow-through system in which it was possible to simultaneously weigh the test animal and control the RH and temperature in the balance chamber, which solved the problems due to disruption when weighing the animals. More recently, flow-through respirometry has been used to measure  $\text{CO}_2$  and water vapour production simultaneously in arthropods (Gibbs et al., 1998; Williams et al., 1998). This experimental set-up requires

temporary perfusion with dry air, which may induce a response from the experimental animal. Other investigators have developed a method to measure water loss isotopically (Wharton and Richards, 1978). However, the injection of tritiated solutions into animals introduces problems due to the puncture of the cuticle causing stress and wounds that must be treated. Water loss rates obtained isotopically are in principle unidirectional effluxes, and hence often slightly higher than the net changes determined gravimetrically (Hadley, 1994). Another possible limitation of isotope methods is the compartmentalisation of tritium in the arthropod (Hadley, 1994).

Calorimetry is used extensively for metabolic studies in animals (Dauncey, 1991; Harak et al., 1996, 1998, 1999; Kuusik et al., 1994; Lambrecht, 1998; Schmolz et al., 1999, 2002; Schmolz and Lambrecht, 2000; Schaatschmidt et al., 1995). Some of these studies use calorimetric measurements to monitor the heat flux from the animals at prefixed temperature and/or humidity. In some cases, the measurement of heat flow is supplemented by the simultaneous measurements of oxygen consumption (Harak et al., 1996, 1999). Most work in this field is performed on so-called isothermal microcalorimeters, implying instruments designed for work in the microwatt range under isothermal conditions (Guan et al., 1999; Johansson and Wadsö, 1999). In many cases, the versatility of the technique has been enhanced by the insertion of miniaturized analytical sensors into the reaction vessel, thus improving the interpretation of the results (Bäckman and Wadsö, 1991).

In this work we introduce a method combining two calorimeters, which enables the simultaneous quantification of water exchange and heat production of an experimental animal. Calorimetric approaches to vapour sorption have previously been presented by Wadsö and Wadsö (1996, 1997) and Markova and Wadsö (1999), and a methodology similar to the one employed here has previously been used for studies of the hydration of compounds of pharmaceutical interest (Lehto and Laine, 2000).

In the present study the twin calorimetric method is used to examine water exchange and related metabolic heat production in drought-stressed larvae of *T. molitor*. The results indicate that an increase in metabolism prior to the initiation of water vapour absorption reflects a sensory response to the RH of the experimental chamber.

## Materials and methods

### *Tenebrio molitor* acclimation

The larvae *Tenebrio molitor* L. were reared on flour in laboratory culture at room temperature and ambient humidity at Roskilde University. Several weeks before calorimetric measurement, larvae were placed in separate glass vials without food, light and at RH <10% over silica gel. A few larvae were acclimated with an ambient RH of approximately 30% in a flow-through system with saturated KCl-solution as water absorbent. The acclimation temperature was  $21 \pm 1^\circ\text{C}$ .

### Instrumentation

The calorimetric measurements were conducted on a thermal activity monitor (TAM) 2277 isothermal calorimeter (Thermometric A/B, Järfälla, Sweden) equipped with an amplifier module enabling a resolution of the heat flow measurements extending into the nW range. The instrument has a total of four calorimetric channels, each of which consists of a sample cell and a reference cell mounted in a separate heat sink. This design allows independent measurement of the differential (sample – reference) heat flow in each channel, with the only restriction that the experimental temperature is the same (since all four heat sinks are in the same water bath). During measurement, the primary observable variable is simply the temperature difference between the sample and the reference; through appropriate calibration this translates into the sample-to-reference heat flow (in W). Details of a very similar, albeit less sensitive, version of this equipment have been published by its inventors (Suurkuusk and Wadsö, 1982).

In the current application, one type 2250 perfusion module (Thermometric) with a 1 ml stainless steel cell, and one type 2250 RH module (4 ml stainless steel cell), were used in each trial according to the methodology below.

The response of the *T. molitor* larvae towards changes in humidity was studied by exposing the experimental animals to a flow of atmospheric air at a controlled rate and RH. To this end, the calorimeter was equipped with a 1131 RH control module (Thermometric), which regulated two computer-controlled mass flow valves (Bronkhorst, the Netherlands). During operation, dry atmospheric air is supplied from a tank to the mass flow valves, which generate two air streams of specific flow rates. One stream was saturated with water vapour in a series of two humidifying chambers in the RH 2250

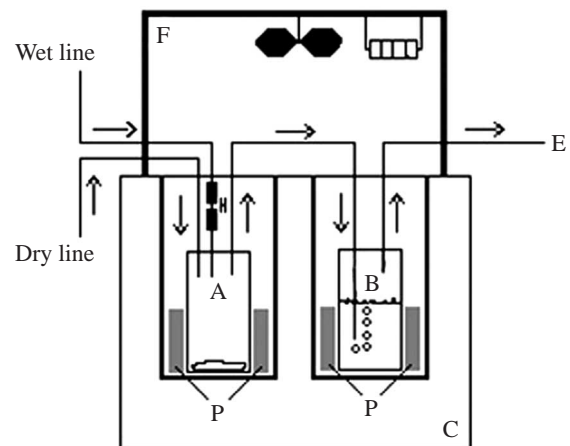

Fig. 1. A schematic drawing of the calorimetric set-up. The reference sides of the calorimetric units and heat exchangers are excluded from the drawing for clarification. A, sample cell (cell A), housing experimental animal, placed in the first calorimetric unit; B, evaporation cell (cell B), for measurements of relative humidity of the gas flow, placed in the second calorimetric unit; F, thermostated fanned box; H, humidifying chambers; P, Peltier elements; C, thermostat; E, exhaust line.

calorimetric module (H in Fig. 1), while the other was led directly to the calorimetric cell. In this way, adjustment of the rates of the two air streams allowed control of the RH in the calorimetric cell A, which houses the larvae. This control may involve keeping a constant humidity or more complicated protocols of pre-programmed linear gradients in humidity or stepwise changes.

The parts of the 2250 calorimetric modules that are outside the TAM instrument as well as the Teflon® tubing that carries the gas flow were housed in a fanned box kept at  $49 \pm 0.2^\circ\text{C}$  (F in Fig. 1) on top of the TAM. This prevented any measurable adsorption of vapour in the auxiliary equipment.

### Methodology

The experimental approach was based on the use of two serially connected calorimetric modules, which were continuously purged with the stream of atmospheric air from the mass flow valves (Fig. 1). This set-up allowed simultaneous, real-time measurement of the metabolic activity and the water exchange of the larvae.

The air stream entered the first calorimetric cell (A in Fig. 1) at a total air flow rate  $J_{\text{air}}$  (volume/time) and a nominal RH,  $\text{RH}_{\text{supply}}$  (in %). The thermal output (or heat flow) of cell A,  $\text{HF}_A$ , signifies the combined effect of the metabolic heat and the thermal effects of water adsorbed or evaporated from the animal or the walls of the calorimetric cell. Due to these adsorption/evaporation effects, the actual RH in the calorimetric cell,  $\text{RH}_{\text{cell}}$ , which governs the water exchange of the larvae, is usually different from  $\text{RH}_{\text{supply}}$ . Subsequent to purging cell A, the air stream was led to cell B, which contained 700  $\mu\text{l}$  distilled water, and served to measure  $\text{RH}_{\text{cell}}$ . Thus, saturation of the purge gas with water vapour required a small evaporation, and the associated endothermic heat flow of cell B,  $\text{HF}_B$ , directly reflected the humidity of the incoming air flow. Thus, if the vapour is considered an ideal gas:

$$\text{RH}_{\text{cell}} = 100[1 - (\text{HF}_B \times \text{RT}) / (J_{\text{air}} \times \Delta H_{\text{evap}} \times P^*)], \quad (1)$$

where  $R$  is the gas constant,  $T$  is the absolute temperature,  $\Delta H_{\text{evap}}$  is the heat of evaporation and  $P^*$  is the vapour pressure of pure water. The two latter quantities, respectively  $44.0 \text{ kJ mol}^{-1}$  (Lindstrom and Mallard, 2003) and  $31.58 \text{ mbar}$  (Weast, 1986), are taken at the experimental temperature,  $25.0^\circ\text{C}$ .

Along the same lines,  $\text{HF}_B$  can be used to quantify the exchange of water between the animal and the gas stream. To do so, the adsorption behaviour of cell A must be singled out in a control experiment where the reference heat flows  ${}^{\text{ref}}\text{HF}_A$  and  ${}^{\text{ref}}\text{HF}_B$  are measured under the same experimental conditions, but with an empty cell in calorimeter A. Once the reference heat flows are established, the difference  $\text{HF}_B - {}^{\text{ref}}\text{HF}_B$  signifies whether the air stream is enriched or depleted with respect to water during its passage over the larvae in cell

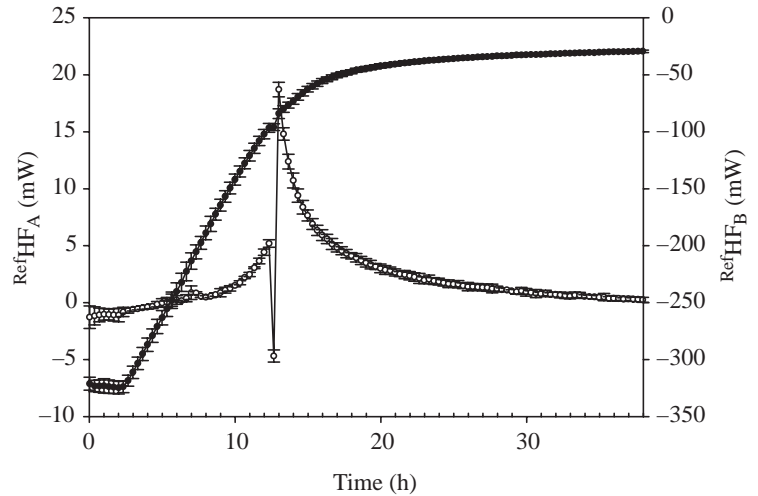

Fig. 2. Results from repeated control measurements (means  $\pm$  S.D.) for cell A ( ${}^{\text{ref}}\text{HF}_A$ ; open circles,  $N=4$ ) and cell B ( ${}^{\text{ref}}\text{HF}_B$ ; closed circles,  $N=6$ ). The relative humidity was scanned from 60% to 100% over 12 h as described in detail in the text.

A, and the exchange of water,  $W_{\text{H}_2\text{O}}$  (mass/time), can be written:

$$W_{\text{H}_2\text{O}} = -(\text{HF}_B - {}^{\text{ref}}\text{HF}_B)M_{\text{H}_2\text{O}} / \Delta H_{\text{evap}}, \quad (2)$$

where  $M_{\text{H}_2\text{O}}$  is the molecular mass of water.

When the water exchange  $W_{\text{H}_2\text{O}}$  has been quantified, the calorimetric output  $\text{HF}_A$  can be analysed with respect to its constituent contributions. Hence the metabolic heat production  $\text{HF}_{\text{metabol}}$  can be written:

$$\text{HF}_{\text{metabol}} = \text{HF}_A - {}^{\text{ref}}\text{HF}_A + (\text{HF}_B - {}^{\text{ref}}\text{HF}_B), \quad (3)$$

where  ${}^{\text{ref}}\text{HF}_A$  reflects water adsorption to the calorimetric cell and  $(\text{HF}_B - {}^{\text{ref}}\text{HF}_B)$  water exchange of the animal. As it will appear below,  ${}^{\text{ref}}\text{HF}_A$  was small, while  $(\text{HF}_B - {}^{\text{ref}}\text{HF}_B)$  became significant under conditions of high humidity, where the larva absorbed significant amounts of vapour.

Mixing of gas in the volumes of calorimetric cells and the tubing introduces a delay in the detection (in cell B) of water absorbed by the animal (in cell A). This delay depends on the magnitude of the 'dead-volume' and the flow rate  $J_{\text{air}}$ . Assuming fast equilibration of humidity gradients inside cell A, the delay follows an exponential time course and can readily be quantified. In this work, however, we did not apply any explicit time correction on  $W_{\text{H}_2\text{O}}$ . Rather, we established experimentally that the effects of this delay fell to undetectable levels within about 15 min. This is a satisfactory time resolution for the current purpose.

### Results

The purpose of this work is to elucidate water vapour absorption in *Tenebrio molitor* through relationships between  $\text{RH}_{\text{cell}}$ ,  $W_{\text{H}_2\text{O}}$  and  $\text{HF}_{\text{metabol}}$  as defined in Equations 1–3. It appears from the equations that the latter two functions rely on

a difference in heat flows of an experimental trial and a control. Hence the trial-to-trial reproducibility is essential for experimental precision. To test this, we initially measured  ${}^{\text{ref}}\text{HF}_A$  and  ${}^{\text{ref}}\text{HF}_B$  in a number of independent experiments with an empty A cell. Fig. 2 illustrates the average results with standard deviations indicated by the vertical bars. The experimental temperature was  $25^\circ\text{C}$ ,  $J_{\text{air}}$  was  $45 \text{ ml h}^{-1}$ , and the time course of  $\text{RH}_{\text{supply}}$  was 2 h at 60%RH, followed by a linear increase from 60% to 100% over 12 h and constant 100% humidity for an additional 24 h. It appears that the heat flow in cell A increased over the first 15 h of experiment. This reflects the (exothermic) adsorption of water to the cell surface

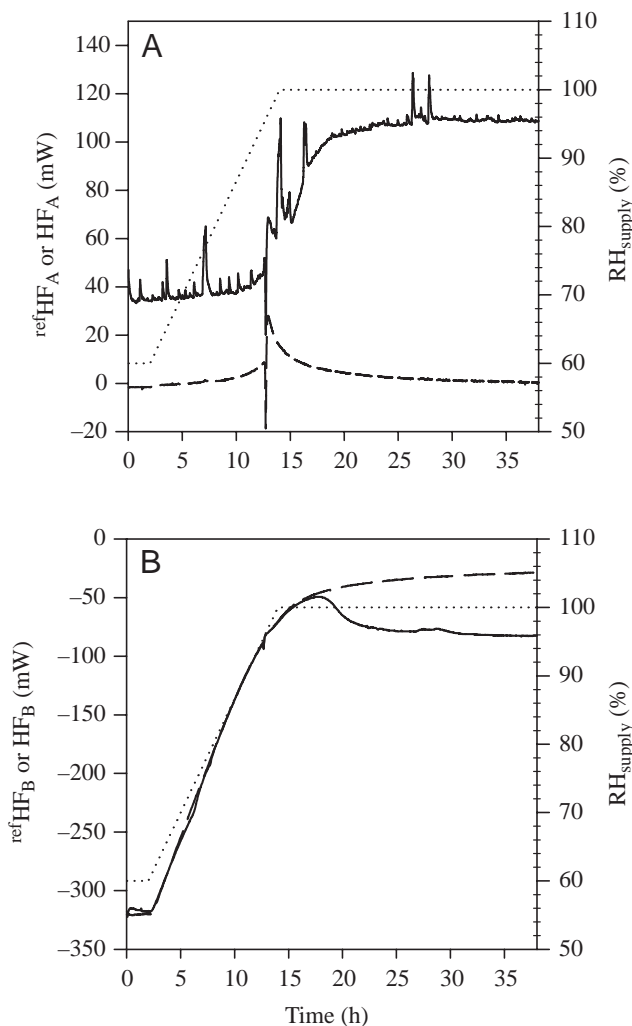

Fig. 3. Raw data for (A) cell A and (B) cell B from an experiment with a *Tenebrio molitor* larva (mass 48.26 mg; solid lines) and for a control experiment (broken lines). The dotted line shows the nominal value  $\text{RH}_{\text{supply}}$  of relative humidity of the air-flow entering cell A. In A, the heat production of the experimental animal is about  $35 \mu\text{W}$  over the initial 12 h. At this point  $\text{HF}_A$  more than doubles over a time span of about 7 h. The abrupt peak in the control experiment observed after 12 h is a reproducible artefact related to the control of the flow-valves (see Fig. 2 and text). In B, a conspicuous difference between experiment (solid line) and control (broken line) is observed after 17 h. This signifies water vapour adsorption by the larva (see Fig. 4).

as the water activity in the air stream increased. As  $\text{RH}_{\text{supply}}$  approached its plateau level,  ${}^{\text{ref}}\text{HF}_A$  decreased, and became practically zero after about 30 h, signifying that adsorption equilibrium was established. A sharp endotherm in the  ${}^{\text{ref}}\text{HF}_A$  trace was observed after approximately 13 h. The origin of this observation is unknown, but since it was highly reproducible it was considered tenable to use the  ${}^{\text{ref}}\text{HF}_A$  profile as shown in Fig. 2 in the calculation of  $\text{HF}_{\text{metabol}}$ . In any case, the numerical magnitude of this effect is rather small compared to measured  $\text{HF}_A$  values (c.f. Fig. 3). More importantly, the  $\text{HF}_A$  data in Fig. 2 show highly reproducible curves with standard deviations around  $1 \mu\text{W}$  or about 1% of the heat production of a typical *T. molitor* larva, throughout the humidity scan. The data for  ${}^{\text{ref}}\text{HF}_B$  shows the expected stepwise behaviour where the (negative) signal is proportional to  $(100 - \text{RH}_{\text{supply}})$ . The rounded course at the high plateau reflects the gradual adsorption in cell A and the final value of  $-30 \mu\text{W}$  signifies (Equation 1) that  $\text{RH}_{\text{cell}}$  reaches a value of about 96% at the end of these trials. The standard deviation of  ${}^{\text{ref}}\text{HF}_B$  decreased from about  $5 \mu\text{W}$  at the lowest humidities to  $1.5 \mu\text{W}$  at the end of the trials. These uncertainties of the control experiments translate (Equation 2) into a detection level for the measurement of water exchange of about  $2\text{--}7 \mu\text{g h}^{-1}$ .

An example of raw data from a trial with experimental parameters matching those for the control experiments discussed above is shown in Fig. 3. A *T. molitor* larva with a body mass of 41.01 mg at full hydration was drought-acclimated for 48 days as described above, and transferred to the calorimeter (body mass now 33.08 mg). Fig. 3A illustrates  $\text{HF}_A$  (solid line) and  $\text{RH}_{\text{supply}}$  (dotted line). For comparison, a reference trial  ${}^{\text{ref}}\text{HF}_A$  from Fig. 2 is also plotted (broken line) in Fig. 3A. While the heat flows and the derived  $\text{RH}_{\text{cell}}$  function (Equation 1) represent actual measurements, the values of  $\text{RH}_{\text{supply}}$  in Fig. 3 are nominal, given by the 1131 RH control unit. The accuracy of these nominal values was examined in separate experiments where cell A contained saturated salt solutions. The null-balance of heat flow when the cell contained saturated NaCl ( $\text{RH}=75.3\%$  at  $25^\circ\text{C}$ ; Clarke and Glew, 1985) suggested that at this RH the nominal values of  $\text{RH}_{\text{supply}}$  were accurate to within 0.5%RH. The heat flow  $\text{HF}_A$  in Fig. 3A shows that the larva investigated here had a heat production of about  $35 \mu\text{W}$  in the first fourth of the experiment. In addition to this basic level a number of small and a few larger peaks were observed. As the humidity of the purge gas increased,  $\text{HF}_A$  increased to about three times the initial value.

Fig. 3B shows an example of raw data from cell B,  $\text{HF}_B$  (solid line). By analogy with Fig. 3A the graph in Fig. 3B is supplemented with  ${}^{\text{ref}}\text{HF}_B$  (broken line) and  $\text{RH}_{\text{supply}}$  (dotted line). Inspection of the data shows that during the initial plateau at 60%RH,  $\text{RH}_B$  was less negative than  ${}^{\text{ref}}\text{HF}_B$ . This shows that the presence of the larva in cell A increased the humidity of the gas flow, or, in other words, that the animal was losing water. Conversely, towards the end of the trial, the observation that  $\text{HF}_B < {}^{\text{ref}}\text{HF}_B$  signifies water vapour absorption in the larva.

To facilitate quantitative interpretations, the functions  $\text{RH}_{\text{cell}}$ ,  $\text{HF}_{\text{metabol}}$  and  $W_{\text{H}_2\text{O}}$  were calculated from raw data like

Fig. 4. Representative data showing water flux ( $W_{\text{H}_2\text{O}}$ ; solid lines), corrected specific metabolic heat flow, defined in Equation 3 ( $\text{HF}_{\text{metabol}}$ ; broken lines) and measured (see Equation 1) relative humidity (in %) of cell A ( $\text{RH}_{\text{cell}}$ ; dotted line). The larvae weighed 19.79 mg (A), 45.95 mg (B) and 33.08 mg (C). For  $W_{\text{H}_2\text{O}}$  the sign is defined such that a positive value signifies net water uptake.

those in Fig. 3, and plotted against the experimental time as exemplified in Fig. 4A–C, which represents three larvae that had been pre-acclimated for 47–62 days without food. At the beginning of the calorimetric measurements the wet masses were, respectively, 19.79 mg, 45.95 mg and 33.08 mg. The curves in Fig. 4 show  $\text{RH}_{\text{cell}}$ , (dotted lines),  $\text{HF}_{\text{metabol}}/M_w$  (broken lines) and  $W_{\text{H}_2\text{O}}/M_w$  (solid lines), where  $M_w$  is the wet mass of the animal at the beginning of the calorimetric measurement. Since  $\text{HF}_{\text{metabol}}$  and  $W_{\text{H}_2\text{O}}$  are expected to scale with the size of the experimental animal, these functions were normalized with respect to  $M_w$  before plotting the data in Fig. 4. The results in Fig. 4 and analogous data for trials not presented graphically showed several general features. Some of these are listed in Table 1, together with information of the pre-acclimation. It appears that the larvae consistently initiated WVA when  $\text{RH}_{\text{cell}}$  reached  $92.7 \pm 0.6\% \text{RH}$  and that the absorption subsequently decreased  $\text{RH}_{\text{cell}}$  to  $88.6 \pm 0.5$ . Table 1 also lists the maximal absorption rate, which was  $86 \pm 6 \mu\text{g h}^{-1}$  and independent of the body mass, and estimates of the average metabolic heat production during the initial (0–10 h) and intermediate (15–20 h) stages of the experiment.

### Discussion

The current calorimetric method was devised to allow simultaneous observation of metabolic activity and water exchange during controlled changes in the ambient water vapour pressure. The critical factor for the determination of both of these functions is the precision by which  $\text{HF}_B - \text{refHF}_B$  can be determined. The magnitude of this difference, which is in general much smaller than each of the heat flows, directly dictates the water exchange  $W_{\text{H}_2\text{O}}$  (Equation 2) and, under most of the conditions experienced here, it is also the most important source of error in the calculation of metabolic heat production,  $\text{HF}_{\text{metabol}}$  (Equation 3). Based on the reproducibility of  $\text{refHF}_B$  illustrated in Fig. 2, and similar data obtained under different experimental conditions (not shown), the uncertainty for  $W_{\text{H}_2\text{O}}$  exchange is about  $2\text{--}7 \mu\text{g h}^{-1}$  (i.e.  $\pm 2\text{--}7 \text{ nl liquid water per hour}$ ), which is 1–2 orders of magnitude better than values typically obtained using

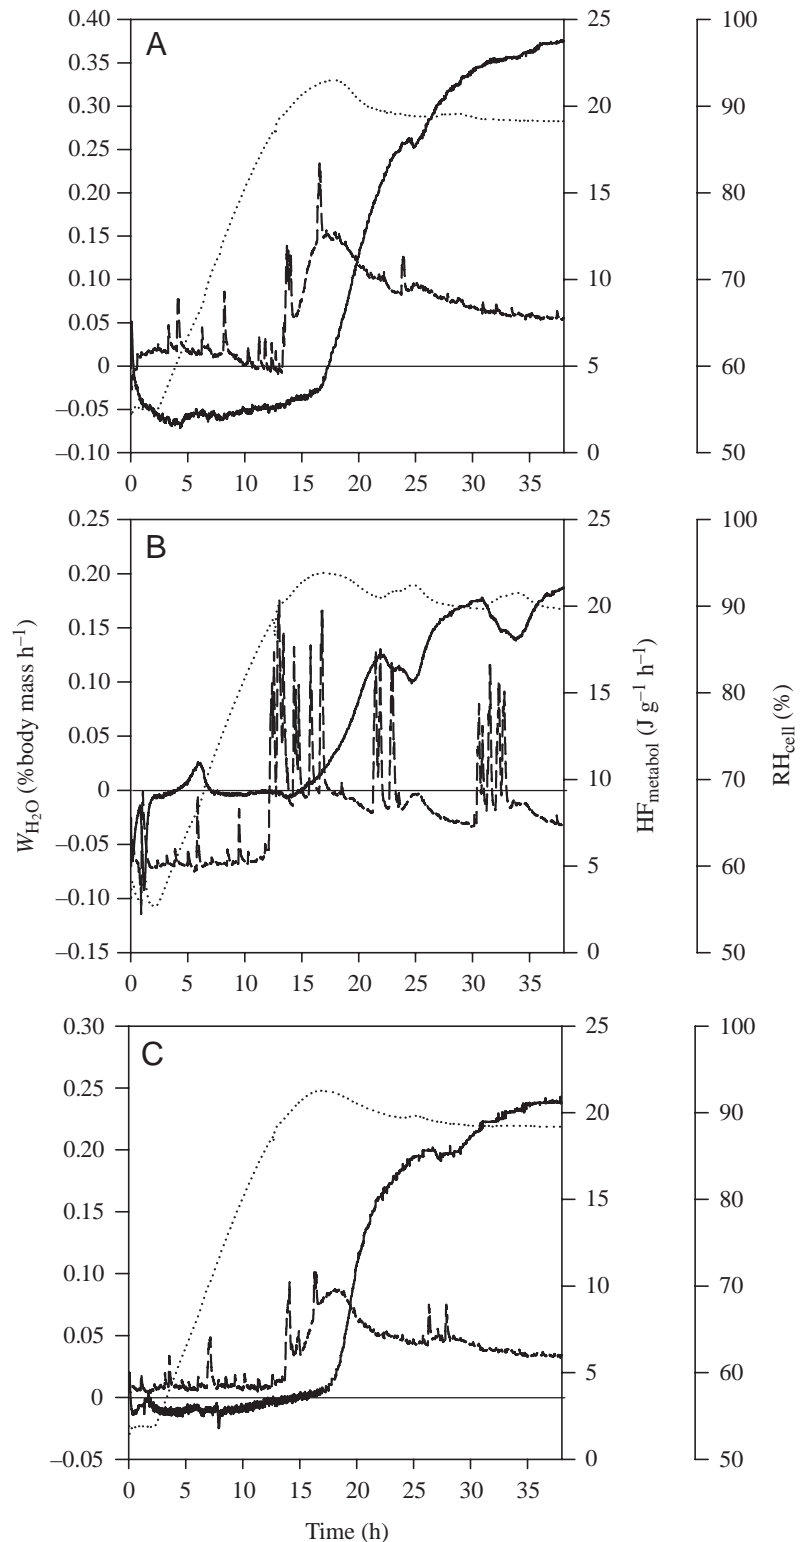

gravimetric techniques (Dunbar and Winston, 1975; Machin, 1975). In addition to a satisfactory precision level, the calorimetric method may have some other advantages. It is particularly suited to elucidation of the dynamics of the processes, since the primary observable variable (heat flow) reflects a rate (e.g. water uptake) rather than an integral

Table 1. *Compilation of data from the acclimation procedure and the calorimetric measurements for larvae of Tenebrio molitor*

| Flow $J_{\text{air}}$<br>(ml h <sup>-1</sup> ) | Mass (mg)             |                      | Mass loss<br>during<br>acclimation<br>(%) | Start<br>of WVA<br>(RH <sub>supp</sub> ) | Min. RH<br>during WVA<br>(RH <sub>cell</sub> ) | $W_{\text{H}_2\text{O}}$ max.<br>uptake rate |                       | HF <sub>metabol</sub><br>(J g <sup>-1</sup> h <sup>-1</sup> ) |       | Total uptake<br>(mg H <sub>2</sub> O) |
|------------------------------------------------|-----------------------|----------------------|-------------------------------------------|------------------------------------------|------------------------------------------------|----------------------------------------------|-----------------------|---------------------------------------------------------------|-------|---------------------------------------|
|                                                | Before<br>acclimation | After<br>acclimation |                                           |                                          |                                                | % $M_b$ h <sup>-1</sup>                      | mg h <sup>-1</sup>    | Initial                                                       | Final |                                       |
| 45 (A)                                         | 24.82                 | 19.79                | 20.3                                      | 92.5                                     | 88.3                                           | 0.381                                        | 7.9×10 <sup>-2</sup>  | 4.6                                                           | 8.0   | 1.18                                  |
| 45 (C)                                         | 41.01                 | 33.08                | 19.3                                      | 92.3                                     | 88.3                                           | 0.243                                        | 8.1×10 <sup>-2</sup>  | 4.1                                                           | 6.3   | 1.33                                  |
| 45 (B)                                         | 54.90                 | 45.95                | 16.3                                      | 92.7                                     | 89.5                                           | 0.189                                        | 8.7×10 <sup>-2</sup>  | 4.9                                                           | 7.5   | 1.37                                  |
| 45                                             | 62.05                 | 48.48                | 21.9                                      | 92.1                                     | 88.2                                           | 0.182                                        | 8.8×10 <sup>-2</sup>  | 4.9                                                           | 6.5   | 1.12                                  |
| 45                                             | 94.50                 | 84.06                | 11.0                                      | 92.8                                     | 88.5                                           | 0.113                                        | 9.5×10 <sup>-2</sup>  | 5.0                                                           | 5.9   | 1.73                                  |
| 45                                             | 147.88                | 123.8                | 16.3                                      | 93.7                                     | 88.5                                           | 0.071                                        | 8.8×10 <sup>-2</sup>  | 2.7                                                           | 3.7   | 1.46                                  |
| 100                                            | 44.47                 | 42.62                | 4.2                                       | 91.3                                     | 90.1                                           | 0.263                                        | 11.2×10 <sup>-2</sup> | 4.6                                                           | 6.7   | 1.21                                  |
| 100                                            | 52.60                 | 48.37                | 8.0                                       | 94.8                                     | 91.2                                           | 0.178                                        | 8.6×10 <sup>-2</sup>  | 4.9                                                           | 5.8   | 0.32                                  |

A–C in the first column identify the data shown in Fig. 4.

WVA, water vapour absorption; RH, relative humidity;  $M_b$ , body mass (g).

quantity (e.g. body mass). As a result, the method is not prone to the uncertainty of estimating rates on the basis of small (time-dependent) changes in body mass. This aspect is illustrated in Fig. 4B and will be discussed further below. Calorimetry has previously been shown to cause limited stress to the experimental animal (Harak et al., 1998) and the current set-up is quite flexible and readily allows changes in flow rate ( $J_{\text{air}}$ ), experimental temperature and gas composition.

The *Tenebrio molitor* larvae investigated produced qualitatively uniform results in the calorimetric trials, and several interesting trends can be identified. Thus, a well-defined threshold value of  $92.7 \pm 0.6\%$  RH was observed for the onset of WVA for animals exposed to a linear RH ramp increasing at a slope of 3% RH per hour (Table 1). Over the subsequent 5 h we observed a strong increase in  $W_{\text{H}_2\text{O}}$  (Fig. 4), signifying the absorption of water in the larva. The  $W_{\text{H}_2\text{O}}$  function reached a steady (maximal) value of  $86 \pm 6 \mu\text{g h}^{-1}$  about 10–15 h after the threshold RH had been passed. The WVA consistently reduced RH<sub>cell</sub> to  $88.6 \pm 0.5\%$  (Table 1). Interestingly, these final values of  $W_{\text{H}_2\text{O}}$  and RH<sub>cell</sub> showed no dependence on the size of the experimental animal. This suggests that the WVA value observed here is limited by the magnitude of the RH gradient or the amount of water furnished by the incoming moist air. Hence, reduction of RH from 97% to 88.6% for  $J_{\text{air}}=45 \text{ ml h}^{-1}$  corresponds to a water uptake of  $87 \mu\text{g h}^{-1}$ . To test this further we conducted two trials, in which  $J_{\text{air}}$  was increased to  $100 \text{ ml h}^{-1}$  (Table 1). The results showed slightly elevated maximal values of  $W_{\text{H}_2\text{O}}$  (90 and  $112 \mu\text{g h}^{-1}$ , respectively). The observation that the maximal uptake rate does not scale with the supply of vapour as defined by  $J_{\text{air}}$  at a fixed RH suggests that the values of  $W_{\text{H}_2\text{O}}$  recorded here are indeed close to the maximum capacity of the larvae, but a detailed analysis of this and its dependence of the body size awaits further comparative studies. The observation that *T. molitor* larvae may absorb water down to ambient activities corresponding to approximately 88% RH is in accordance with previous studies (Dunbar and Winston, 1975; Grimstone et al., 1968; Machin, 1975, 1976, 1978; Mellanby, 1932; Noble-

Nesbitt, 1973, 1978; O'Donnell and Machin, 1991; Ramsay, 1964). These latter studies, however, did not report the existence of any RH threshold higher than 88% RH required to initiate WVA, although a threshold of 89.7% RH has been discussed (Coutchié and Machin, 1984). To test the existence of such a threshold more specifically, we measured the water exchange in four larvae in trials where the final value RH<sub>supply</sub> was 90% (otherwise the experimental parameters were equivalent to those used in the measurements illustrated in Fig. 4). The data showed no clear increase in  $W_{\text{H}_2\text{O}}$  during the 24 h exposure to 90% RH<sub>supply</sub> (corresponding to RH<sub>cell</sub>=86%), confirming that the larvae investigated here require exposure to a threshold value (>90% RH) to initiate WVA.

An interesting property observed for all trials was a conspicuous increase in HF<sub>metabol</sub> about 13 h into the experiment (Fig. 4). At this point, the base level of heat production typically doubled (from 5 to  $10 \text{ J g}^{-1} \text{ h}^{-1}$ ) within a few hours. The increase in HF<sub>metabol</sub> consistently occurred 3 h prior to the initiation of WVA, and the heat production stayed high during the initial stages of absorption. Later, as  $W_{\text{H}_2\text{O}}$  approached a steady level, metabolic heat production gradually decreased. The experiments with a maximal RH<sub>supply</sub> of 90% corresponding to a maximal RH<sub>cell</sub> of about 86%, did not show WVA, and no increase in HF<sub>metabol</sub> was observed. Hence, we suggest that the increase in HF<sub>metabol</sub> and the initiation of WVA are correlated. The enhanced metabolic heat production sets in at RH<sub>cell</sub>=88%, i.e. the steady level observed during prolonged WVA, and these observations raise intriguing questions regarding a sensory regulation of WVA. For example, it seems to be of interest for future work to investigate if the enhanced metabolism reflects preparation of the WVA apparatus stimulated by a critical ambient humidity of about 88%. It could tentatively be suggested that this preparation is redistribution of ions and fluids within the cryptonephridial complex. It may also indicate a *de novo* synthesis or rearrangement of strongly hygroscopic proteins (i.e. thermal hysteresis proteins; Patterson and Duman, 1978) or other proteins earlier reported from *Tenebrio molitor* (Kroeker and

Walker, 1991). The minimal (reversible) work associated with the transport of water from RH=88% to the body of the larva is about 0.3 kJ mol<sup>-1</sup> water. Using typical values of  $W_{H_2O}$  and body mass (Table 1), this translates into a heat flow of less than 0.5 J g<sup>-1</sup> h<sup>-1</sup>, and suggests that the enhanced metabolism directly required to sustain the maximal WVA observed here is too small to be detected in the HF<sub>metabol</sub> function.

The HF<sub>metabol</sub> traces showed a number of sharp peaks. This behaviour has been studied in detail previously, and it was concluded that the larger peaks (amplitude >20 µW) arise from wriggling movements, while smaller peaks are due to abdominal pulsations and tracheal ventilation (Harak et al., 1998; Kuusik et al., 1994). Inspection of Fig. 4B, for example, shows a clear tendency of decreased WVA during the occurrence of large peaks in HF<sub>metabol</sub> (wriggling) at the experimental times of 22 and 33 h. This is identified as the local minima in the  $W_{H_2O}$  function, and the effect can readily be quantified as the area of the 'dips' in  $W_{H_2O}$ . The examples in Fig. 4B suggest that each of these two periods of wriggling, which last about 3 h, is coupled to a cutback in WVA of about 60 µg water. This could be either a result of a less efficient WVA in moving larvae or (more likely) water loss through a separate process such as enhanced respiration in the active animals. A qualitatively similar observation was made for the smaller peaks (≈10 µW due to pulsation/ventilation), and analysis of the 'dips' in the  $W_{H_2O}$  function suggests a concomitant water loss of 10–15 µg over a period of about 30 min. Systematic calorimetric studies of interrelationships between respiratory activity and water loss are currently in progress.

In conclusion, we have found that calorimetry is an effective tool for real-time studies of WVA in small invertebrates. The current results show that upon exposure to a threshold value of 92–93%RH, *T. molitor* absorbs water at a rate of about 90 µg h<sup>-1</sup>. During the absorption, the humidity of the experimental chamber was reduced to 88%RH despite continuous perfusion with air that was practically water saturated. The onset of WVA was preceded by a pronounced increase in the metabolic heat, and this parameter gradually decreased to the pre-WVA level over the following 24 h of water absorption. This suggests a sensory and active control of WVA.

#### List of abbreviations

|                       |                                                         |
|-----------------------|---------------------------------------------------------|
| HF <sub>A</sub>       | thermal output of cell A                                |
| HF <sub>B</sub>       | thermal output of cell B                                |
| HF <sub>metabol</sub> | metabolic heat production rate                          |
| $J_{air}$             | air flow rate                                           |
| refHF <sub>A</sub>    | thermal output for control experiment of cell A         |
| refHF <sub>B</sub>    | thermal output for control experiment of cell B         |
| RH                    | relative humidity                                       |
| RH <sub>cell</sub>    | actual relative humidity in cell A                      |
| RH <sub>supply</sub>  | nominal relative humidity of air stream entering cell A |
| TAM                   | thermal activity monitor                                |
| $W_{H_2O}$            | water exchange rate                                     |
| WVA                   | water vapour absorption                                 |

This work was supported by the Carlsberg Foundation.

#### References

- Audsley, N., Coast, G. M. and Schooley, D. A. (1993). The effects of *Manduca sexta* diuretic hormone on fluid transport by the Malpighian tubules and cryptonephric complex of *Manduca sexta*. *J. Exp. Biol.* **178**, 231-243.
- Bäckman, P. and Wadsö, I. (1991). Cell growth experiments using a microcalorimetric vessel equipped with oxygen and pH electrodes. *J. Biochem. Biophys. Meth.* **23**, 283-293.
- Beament, J. W. L. (1959). The waterproofing mechanism of arthropods. *J. Exp. Biol.* **36**, 391-422.
- Buxton, P. A. (1930). Evaporation from the meal-worm (Tenebrio: Coleoptera) and atmospheric humidity. *Proc. R. Soc. Lond. B* **106**, 560-577.
- Clarke, E. C. W. and Glew, D. N. (1985). Evaluation of the thermodynamic functions for aqueous sodium chloride from equilibrium and calorimetric measurements below 154°C. *J. Phys. Chem. Ref. Data* **14**, 489-610.
- Coutchié, P. A. and Machin, J. (1984). Allometry of water vapor absorption in two species of Tenebrionid beetle larvae. *Am. J. Physiol.* **247**, 230-236.
- Dauncey, M. J. (1991). Whole-body calorimetry in man and animals. *Thermochim. Acta* **193**, 1-40.
- Dunbar, B. S. and Winston, P. W. (1975). The site of active uptake of atmospheric water in larvae of *Tenebrio molitor*. *J. Insect Physiol.* **21**, 495-500.
- Edney, E. B. (1971). Some aspects of water balance in Tenebrionid beetles and a Thysanuran from the Namib desert of southern Africa. *Physiol. Zool.* **44**, 61-76.
- Gibbs, A. G., Louie, A. K. and Ayala, J. A. (1998). Effects of temperature on cuticular lipids and water balance in a desert *Drosophila* thermal acclimation beneficial? *J. Exp. Biol.* **201**, 71-80.
- Grimstone, A. V., Mullinger, A. M. and Ramsay, J. A. (1968). Further studies on the rectal complex of the mealworm *Tenebrio molitor*, L. (Coleoptera, Tenebrionidae). *Phil. Trans. R. Soc. Lond. A* **253**, 334-382.
- Guan, Y. H., Lloyd, P. C. and Kemp, R. B. (1999). A calorimetric flow vessel optimised for measuring the metabolic activity of animal cells. *Thermochim. Acta* **332**, 211-220.
- Hadley, N. F. (1994). *Water Relation of Terrestrial Arthropods*. San Diego: Academic Press, Inc.
- Harak, M., Kuusik, A., Hiiesaar, K., Metspalu, L., Luik, A. and Tarteets, U. (1998). Calorimetric investigations on physiological stress in *Tenebrio molitor* (Coleoptera, Tenebrionidae) pupae. *Thermochim. Acta* **309**, 57-61.
- Harak, M., Lambrecht, I. and Kuusik, A. (1996). Metabolic cost of ventilating movements in pupae of *Tenebrio molitor* and *Galleria mellonella* studied by direct calorimetry. *Thermochim. Acta* **276**, 41-47.
- Harak, M., Lambrecht, I., Kuusik, A., Hiiesaar, K., Metspalu, L. and Tarteets, U. (1999). Calorimetric investigations of insect metabolism and development under the influence of a toxic plant extract. *Thermochim. Acta* **333**, 39-48.
- Johansson, P. and Wadsö, I. (1999). Towards more specific information from isothermal microcalorimetric measurements on living systems. *J. Therm. Anal. Cal.* **57**, 275-281.
- Kroeker, E. M. and Walker, V. K. (1991). Dsp28: A desiccation stress protein in *Tenebrio molitor* haemolymph. *Arch. Insect Biochem. Physiol.* **17**, 169-182.
- Kuusik, A., Tarteets, U., Harak, M., Hiiesaar, K. and Metspalu, L. (1994). Developmental changes during metamorphosis in *Tenebrio molitor* (Coleoptera: Tenebrionidae) studied by calorimetric thermography. *Eur. J. Entomol.* **91**, 297-305.
- Lambrecht, I. (1998). Monitoring metabolic activities of small animals by means of microcalorimetry. *Pure Appl. Chem.* **70**, 695-700.
- Lehto, V.-P. and Laine, E. (2000). Simultaneous determination of the heat and the quantity of vapor sorption using a novel microcalorimetric method. *Pharm. Res.* **17**, 701-706.
- Lindstrom, P. J. and Mallard, W. G. (2003). Nist standard reference database number 69. In *NIST Chemistry Web Book* (ed. P. J. Lindstrom and W. G. Mallard), <http://webbook.nist.gov>. Gaithersburg, MD: National Institute of Standards and Technology.
- Machin, J. (1975). Water balance in *Tenebrio molitor*, L. larvae; the effect of atmospheric water adsorption. *J. Comp. Physiol. B* **101**, 121-132.
- Machin, J. (1976). Passive exchanges during water vapour absorption in mealworms (*Tenebrio molitor*): A new approach to studying the phenomenon. *J. Exp. Biol.* **65**, 603-615.

- Machin, J.** (1978). Water vapour uptake by *Tenebrio*: A new approach to studying the phenomenon. In *Comparative Physiology – Water, Ions and Fluid Mechanics* (ed. L. Bolis, K. Schmidt-Nielsen and S. H. P. Maddrell), pp. 67-77. Cambridge: Cambridge University Press.
- Machin, J. and O'Donnell, M. J.** (1991). Rectal complex ion activities and electrochemical gradients in larvae of the desert beetle, *Onymacris*: Comparisons with *Tenebrio*. *J. Insect Physiol.* **37**, 829-838.
- Markova, N. and Wadsö, L.** (1999). A microcalorimetric study of water vapor sorption on morphine sulphate. *J. Therm. Anal. Cal.* **57**, 133-137.
- Mellanby, K.** (1932). The effect of atmospheric humidity on the metabolism of the fasting mealworm (*Tenebrio molitor* L., Coleoptera). *Proc. R. Soc. Lond. B* **111**, 376-390.
- Noble-Nesbitt, J.** (1970). Structural aspects of penetration through insect cuticles. *Pest. Sci.* **1**, 204-208.
- Noble-Nesbitt, J.** (1973). Rectal uptake of water in insects. In *Comparative Physiology* (ed. L. Bolis, K. Schmidt-Nielsen and S. H. P. Maddrell), pp. 333-351. New York: Elsevier.
- Noble-Nesbitt, J.** (1978). Absorption of water vapour by *Thermobia domestica* and other insects. In *Comparative Physiology – Water, Ions and Fluid Mechanics* (ed. K. Schmidt-Nielsen, L. Bolis and S. H. P. Maddrell), pp. 53-66. Cambridge: Cambridge University Press.
- O'Donnell, M. and Machin, J.** (1991). Ion activities and electrochemical gradients in the mealworm rectal complex. *J. Exp. Biol.* **155**, 375-402.
- Patterson, J. L. and Duman, J. G.** (1978). The role of the thermal hysteresis factor in *Tenebrio molitor* larvae. *J. Exp. Biol.* **74**, 37-45.
- Pelletier, Y.** (1995). Effects of temperature and relative humidity on water loss by the Colorado potato beetle, *Leptinotarsa decemlineata* (Say). *J. Insect Physiol.* **41**, 235-239.
- Ramløv, H. and Lee, R. E.** (2000). Extreme resistance to desiccation in overwintering larvae of the gall fly *Eurosta solidaginis* (Diptera, Tephritidae). *J. Exp. Biol.* **203**, 783-789.
- Ramsay, J. A.** (1964). The rectal complex of the mealworm *Tenebrio molitor*, L. (Coleoptera, Tenebrionidae). *Phil. Trans. R. Soc. Lond. A* **248**, 280-313.
- Schaatschmidt, B., Matuschka, F.-R. and Lambrecht, I.** (1995). Direct and indirect calorimetric investigations on some snakes. *Thermochim. Acta* **251**, 261-269.
- Schmolz, E., Drutschmann, S., Schrickler, B. and Lambrecht, I.** (1999). Calorimetric measurements of energy contents and heat production rates during development of the wax moth *Galleria mellonella*. *Thermochim. Acta* **337**, 83-88.
- Schmolz, E., Hoffmeister, D. and Lambrecht, I.** (2002). Calorimetric investigations on metabolic rates and thermoregulation of sleeping honeybees (*Apis mellifera carnica*). *Thermochim. Acta* **382**, 221-227.
- Schmolz, E. and Lambrecht, I.** (2000). Calorimetric investigations on activity states and development of homometabolous insects. *Thermochim. Acta* **349**, 61-68.
- Suurkuusk, J. and Wadsö, I.** (1982). A multichannel microcalorimetry system. *Chem. Scr.* **201**, 155-163.
- Wadsö, I. and Wadsö, L.** (1996). A new method for determination of vapour sorption isotherms using a twin double microcalorimeter. *Thermochim. Acta* **271**, 179-187.
- Wadsö, I. and Wadsö, L.** (1997). A second generation twin double microcalorimeter: Measurements of sorption isotherms, heats of sorption and sorption kinetics. *J. Thermal Anal.* **49**, 1045-1052.
- Weast, R. C.** (1986). *CRC Handbook of Chemistry and Physics* (ed. M. J. Astle and W. H. Beyer). Boca Raton, Florida: CRC Press, Inc.
- Wharton, G. W. and Richards, G. A.** (1978). Water vapor exchange kinetics in insects and acarines. *Ann. Rev. Entomol.* **23**, 309-328.
- Williams, A. E., Rose, M. R. and Bradley, T. J.** (1998). Using laboratory selection for desiccation resistance to examine the relationship between respiratory pattern and water loss in insects. *J. Exp. Biol.* **201**, 2945-2952.
